# Supplementary material for: Evolutionary genomics of endangered Hawaiian tree snails (Achatinellidae: Achatinellinae) for conservation of adaptive capacity
Source: PeerJ journal article supplement (doi:10.7717/peerj.10993), 2021-04-22

**A**

ML support

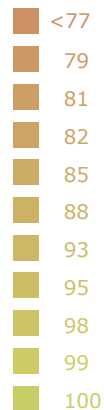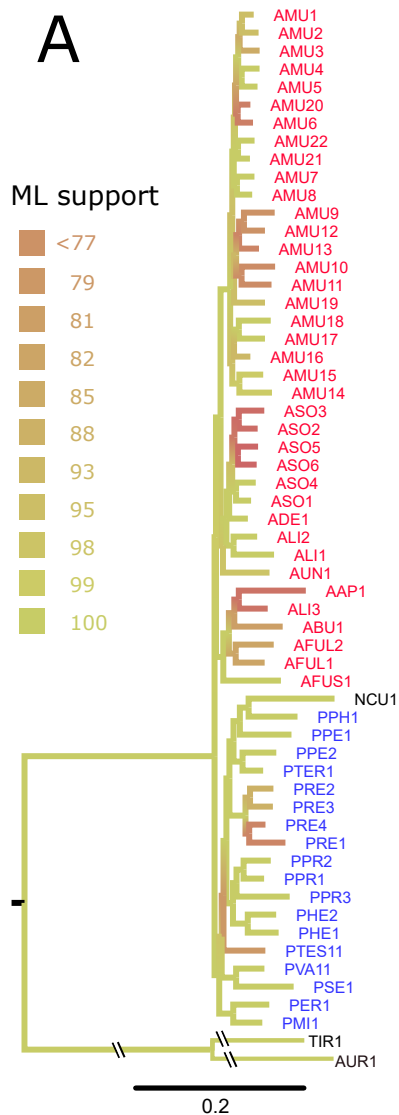**B**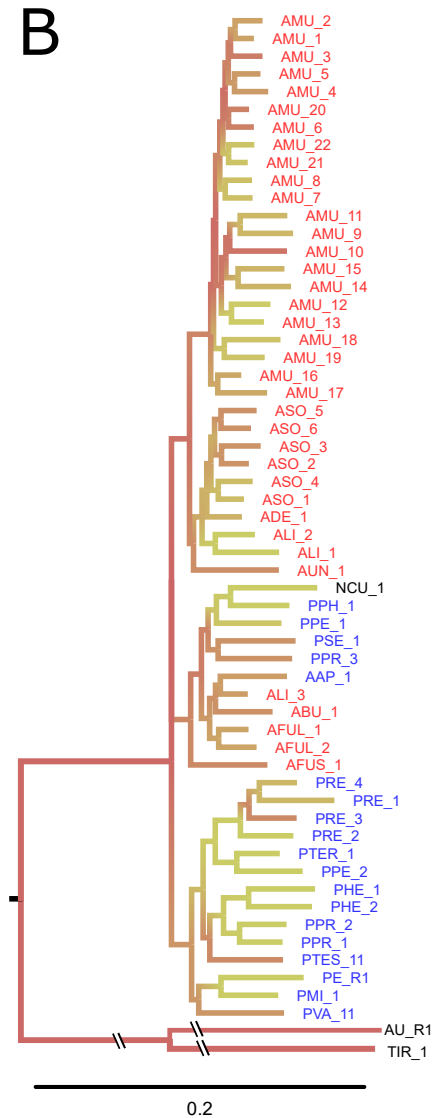**C**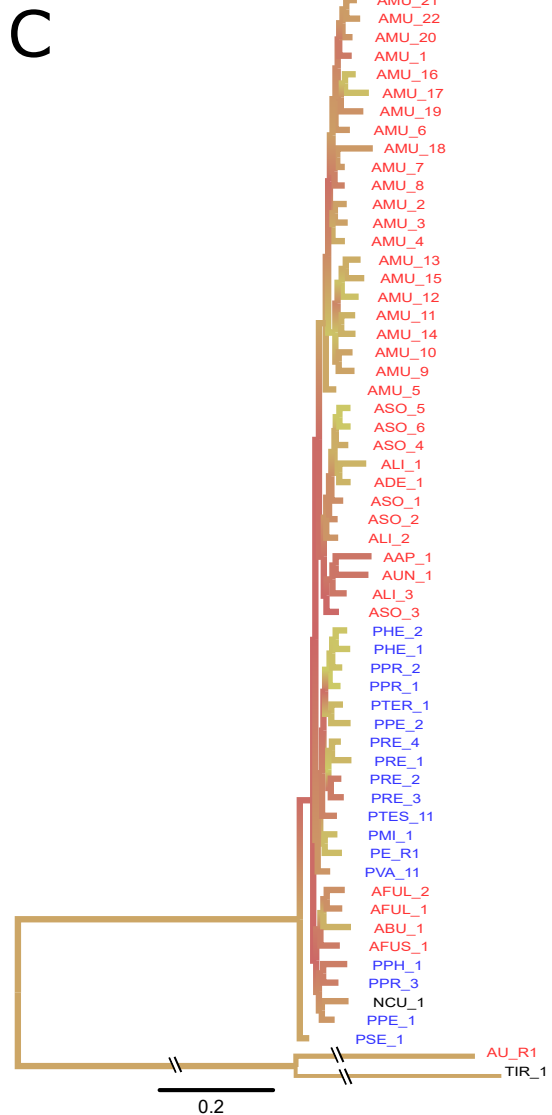

Supplement: Figure_S1.pdf [file Figure_S1.pdf]
