# Supplementary material for: Evolutionary genomics of endangered Hawaiian tree snails (Achatinellidae: Achatinellinae) for conservation of adaptive capacity
Source: PeerJ. 2021 Apr 22;9:e10993. doi: 10.7717/peerj.10993 (PMC8071074; doi:10.7717/peerj.10993)
Supplement: Supplemental Information 2 — Populations that were sequenced were from the family Achatinellidae, and included species from the subfamilies Achatinellinae, Auricullelinae, and Tornatellidinae. The focal species of this study, Achatinella mustelina, included 22 populations from six Evolutionary Significant Units (ESU), named A through F, which were identified in a previous study using the mitochondrial gene COI. [file peerj-09-10993-s002.xlsx]

## Sheet: Table_S1
Subfamily	Genus	Species	Figure Label	Code	ESU	Island	No. Samples	Totalreads	GC	read_lngth	INDV	N_SITES	MEAN_DEPTH	O(HOM)	E(HOM)	N_SITES	F	N_DATA	N_MISS	F_MISS	Mito_bp
Achatinellinae	Achatinella	apexfulva	A. apexfulva	AAP1		Oahu	9	8119538	31.5	276.753	AAP_1	412282	9.23474	93992	89691.8	107462	0.24199	412343	254859	0.618075	15852
Achatinellinae	Achatinella	bulimoides	A. bulimoides	ABU1		Oahu	35	6529944	50.5	244.872	ABU_1	412343	22.3105	160706	155824	180921	0.19452	412343	152468	0.36976	12824
Achatinellinae	Achatinella	byroni	A. byroni	ABY1		Oahu	39	4978746	41.1	231.1	ABY_1	412267	59.8057	164268	162760	179919	0.08788	412343	151437	0.36726	15684
Achatinellinae	Achatinella	concavospira	A. concavospira 1	ACO1		Oahu	15	4562818	41.7	279.5	ACO1	412265	39.907	155334	152224	168211	0.19451	412343	169855	0.411926	12224
Achatinellinae	Achatinella	concavospira	A. concavospira 2	ACO2		Oahu	2	4145876	41.7	204.4	ACO_2	412267	64.2208	145521	143594	158918	0.12576	412343	176202	0.427319	15485
Achatinellinae	Achatinella	decipiens	A. decipiens 1	ADE1		Oahu	6	7054168	41	274.051	ADE_1	412282	62.7232	171988	169318	187187	0.14944	412343	145164	0.352047	6041
Achatinellinae	Achatinella	decipiens	A. decipiens 2	ADE2		Oahu	50	4035250	40.9	189.1	ADE_2	412343	19.8702	139522	147136	171351	-0.31444	412343	162878	0.395006	15306
Achatinellinae	Achatinella	decipiens	A. decipiens 3	ADE3		Oahu	27	4468278	41.2	192.7	ADE_3	412243	44.0246	129244	127765	141353	0.10887	412343	195996	0.475323	14886
Achatinellinae	Achatinella	decipiens	A. decipiens 4	ADE4		Oahu	13	5594312	40.8	191.2	ADE_4	412267	50.2141	136731	135511	149917	0.08467	412343	185123	0.448954	14819
Achatinellinae	Achatinella	decipiens	A. decipiens 5	ADE5		Oahu	5	7054168	41.1	275.6	ADE_5	412262	56.1125	138347	137011	151694	0.09099	412343	182837	0.44341	15186
Achatinellinae	Achatinella	fulgens	A. fulgens 1	AFUL1		Oahu	13	5706416	47.5	233.758	AFUL_1	412343	26.3741	195537	190032	218868	0.1909	412343	100958	0.24484	15309
Achatinellinae	Achatinella	fulgens	A. fulgens 2	AFUL2		Oahu	22	6435940	48	216.105	AFUL_2	412343	29.6982	183043	178302	206077	0.1707	412343	114850	0.27853	15346
Achatinellinae	Achatinella	fuscobasis	A. fuscobasis	AFUS1		Oahu	50	5337352	45	237.38	AFUS_1	412339	23.8626	171329	185280	212834	-0.5063	412343	107700	0.26119	16008
Achatinellinae	Achatinella	lila	A. lila 1	ALI1		Oahu	4	8407198	41.5	300.845	ALI_1	412241	31.8176	114315	111661	123523	0.22374	412343	225969	0.548012	14889
Achatinellinae	Achatinella	lila	A. lila 2	ALI2		Oahu	50	5246316	40	272.239	ALI_2	412282	47.0236	156635	153486	169610	0.19529	412343	164771	0.399597	15596
Achatinellinae	Achatinella	lila	A. lila 3	ALI3		Oahu	24	7618686	48	256.561	ALI_3	412298	28.9682	176587	171959	199050	0.17085	412343	127772	0.309868	14944
Achatinellinae	Achatinella	livida	A. livida	ALIV1		Oahu	50	7095932	51.3	190.3	ALIV_1	412343	25.3409	160332	164711	190927	-0.16702	412343	136610	0.331302	13103
Achatinellinae	Achatinella	mustelina	A. mustelina 1	AMU_1	ESUA	Oahu	60	6246584	44	278.006	AMU_1	412267	52.7169	171492	166934	184583	0.25826	412343	147237	0.357074	16217
Achatinellinae	Achatinella	mustelina	A. mustelina 2	AMU_2	ESUA	Oahu	30	6423834	41	276.644	AMU_2	412267	57.6288	165931	161984	179152	0.22991	412343	152223	0.369166	16258
Achatinellinae	Achatinella	mustelina	A. mustelina 3	AMU_3	ESUB	Oahu	15	5571576	40.5	280.512	AMU_3	412267	46.5337	156283	152186	168185	0.25607	412343	166601	0.404035	16615
Achatinellinae	Achatinella	mustelina	A. mustelina 4	AMU_4	ESUB	Oahu	48	7710220	41	228.319	AMU_4	412267	75.269	169237	167170	184984	0.11602	412343	144049	0.349343	16568
Achatinellinae	Achatinella	mustelina	A. mustelina 5	AMU_5	ESUB	Oahu	40	6380944	41	249.935	AMU_5	412267	59.4759	170073	166963	184672	0.17563	412343	144818	0.351208	16676
Achatinellinae	Achatinella	mustelina	A. mustelina 6	AMU_6	ESUB	Oahu	20	5202138	40.5	281.253	AMU_6	412267	48.3446	168861	164671	181944	0.24257	412343	150607	0.365247	16717
Achatinellinae	Achatinella	mustelina	A. mustelina 7	AMU_7	ESUC	Oahu	24	5901776	41	268.908	AMU_7	412267	55.1887	165967	162486	179596	0.20345	412343	151933	0.368463	16398
Achatinellinae	Achatinella	mustelina	A. mustelina 8	AMU_8	ESUC	Oahu	20	6503420	41	246.91	AMU_8	412267	61.7657	174132	171172	189366	0.16271	412343	139363	0.337978	16416
Achatinellinae	Achatinella	mustelina	A. mustelina 9	AMU_9	ESUD	Oahu	39	3346192	40	238.062	AMU_9	412267	35.55	133185	129914	143760	0.23622	412343	197145	0.478109	16181
Achatinellinae	Achatinella	mustelina	A. mustelina 10	AMU_10	ESUD	Oahu	50	3045848	40.5	284.163	AMU_10	412267	37.6328	133286	129797	143673	0.25143	412343	195776	0.474789	16441
Achatinellinae	Achatinella	mustelina	A. mustelina 11	AMU_11	ESUD	Oahu	30	3518746	41	229.545	AMU_11	412267	38.0558	138456	135410	149896	0.21029	412343	188569	0.457311	16046
Achatinellinae	Achatinella	mustelina	A. mustelina 12	AMU_12	ESUD	Oahu	30	2354794	40	234.564	AMU_12	412267	31.0143	144889	141462	156410	0.22927	412343	182152	0.441749	16177
Achatinellinae	Achatinella	mustelina	A. mustelina 13	AMU_13	ESUD	Oahu	34	3182792	40	235.946	AMU_13	412267	39.5063	156481	153086	169383	0.20835	412343	165134	0.400477	16462
Achatinellinae	Achatinella	mustelina	A. mustelina 14	AMU_14	ESUE	Oahu	31	2965040	41	230.076	AMU_14	412267	35.0797	136706	133597	147767	0.21938	412343	191316	0.463973	16273
Achatinellinae	Achatinella	mustelina	A. mustelina 15	AMU_15	ESUF	Oahu	30	2374954	40	232.936	AMU_15	412267	31.048	143278	139857	154644	0.23133	412343	185572	0.450043	16273
Achatinellinae	Achatinella	mustelina	A. mustelina 16	AMU_16	ESUE	Oahu	4	5774984	40	241.165	AMU_16	412278	54.435	170982	167497	185306	0.19571	412343	145791	0.353567	14841
Achatinellinae	Achatinella	mustelina	A. mustelina 17	AMU_17	ESUE	Oahu	4	3809330	40	276.658	AMU_17	412264	45.6761	147085	143536	158657	0.23471	412343	179954	0.436418	9198
Achatinellinae	Achatinella	mustelina	A. mustelina 18	AMU_18	ESUD	Oahu	6	5362324	41.5	269.657	AMU_18	412167	96.2958	138404	134979	149181	0.24118	412343	192890	0.46779	10682
Achatinellinae	Achatinella	mustelina	A. mustelina 19	AMU_19	ESUD	Oahu	6	5633994	41.5	276.283	AMU_19	412263	129.437	138074	134318	148479	0.26523	412343	195404	0.473887	6920
Achatinellinae	Achatinella	mustelina	A. mustelina 20	AMU_20	ESUB	Oahu	13	5308080	41	273.694	AMU_20	412149	55.9968	175423	171546	189606	0.21465	412343	140776	0.341405	13428
Achatinellinae	Achatinella	mustelina	A. mustelina 21	AMU_21	ESUD	Oahu	15	4931932	41	268.732	AMU_21	412267	51.5863	174647	170822	188888	0.21171	412343	141577	0.343348	10617
Achatinellinae	Achatinella	mustelina	A. mustelina 22	AMU_22	ESUD	Oahu	7	4462150	41	270.571	AMU_22	412264	46.3411	164849	161007	177966	0.22656	412343	155105	0.376155	11905
Achatinellinae	Achatinella	sowerbyana	A. sowerbyana 1	ASO1		Oahu	26	5737666	40	279.604	ASO_1	412282	53.5422	170465	167823	185469	0.14973	412343	146188	0.35453	15374
Achatinellinae	Achatinella	sowerbyana	A. sowerbyana 2	ASO2		Oahu	15	4851700	40	274.9	ASO_2	412282	46.6596	163614	160756	177688	0.16878	412343	155457	0.377009	15321
Achatinellinae	Achatinella	sowerbyana	A. sowerbyana 3	ASO3		Oahu	35	4657426	40	273.434	ASO_3	412267	42.1185	153287	150268	166074	0.19099	412343	169495	0.411053	15260
Achatinellinae	Achatinella	sowerbyana	A. sowerbyana 4	ASO4		Oahu	23	4635484	40	276.36	ASO_4	412281	44.3909	161604	158765	175451	0.17014	412343	158833	0.385196	15366
Achatinellinae	Achatinella	sowerbyana	A. sowerbyana 5	ASO5		Oahu	28	4429486	40.5	260.663	ASO_5	412267	46.6379	160905	158518	175154	0.14347	412343	158076	0.38336	15324
Achatinellinae	Achatinella	sowerbyana	A. sowerbyana 6	ASO6		Oahu	37	5235580	41	264.367	ASO_6	412282	51.6869	163579	161027	177975	0.15057	412343	154889	0.375631	15309
Achatinellinae	Achatinella	sowerbyana	A. sowerbyana 7	ASO7		Oahu	1	82778	42.7	233.2	ASO_7	411218	4.74954	22064	21762.2	24360	0.11618	412343	373359	0.905457	15344
Achatinellinae	Achatinella	sp. Oahu	Achatinella unknown	AUN1		Oahu	1	5226018	41	269.792	AUN_1	412147	65.1177	132657	129003	142544	0.26983	412343	201853	0.489527	8095
Achatinellinae	Newcombia	cumingi	N. cumingi	NCU1		Maui	3	6519964	39	255.936	NCU_1	412280	74.6825	136428	130650	151189	0.2813	412343	194378	0.471399	10696
Achatinellinae	Perdicella	kuhnsi	Pe. kuhnsi	PER1		Maui	1	4951340	41	279.534	PE_R1	412211	45.2268	146240	141700	156719	0.3023	412343	183357	0.444671	10073
Achatinellinae	Perdicella	helena	Pe. helena 1	PHE1		Molokai	33	3675944	40	285.052	PHE_1	412282	31.4931	131281	127433	141055	0.2825	412343	204222	0.495272	15291
Achatinellinae	Perdicella	helena	Pe. helena 2	PHE2		Molokai	31	4074556	40	281.168	PHE_2	412262	37.4596	138646	134584	148857	0.28462	412343	193230	0.468615	14115
Achatinellinae	Partulina	mighelsiana	Pa. mighelsiana	PMI1		Molokai	50	4524560	40	270.927	PMI_1	412267	41.9774	150330	146840	162247	0.22649	412343	174732	0.423754	13704
Achatinellinae	Partulina	perdix	Pa. perdix 1	PPE1		Maui	10	6311830	41	265.791	PPE_1	412341	23.2176	179465	173302	198799	0.24173	412343	127006	0.308011	14349
Achatinellinae	Partulina	perdix	Pa. perdix 2	PPE2		Maui	1	4202976	40	284.145	PPE_2	412170	36.5634	131050	127407	140862	0.27077	412343	204890	0.496892	14427
Achatinellinae	Partulina	perdix	Pa. perdix 3	PTER1		Maui	11	3834086	40	284.33	PTES_11	412128	32.6923	140366	137143	151467	0.22498	412343	190297	0.461502	10781
Achatinellinae	Partulina	physa	Pa. physa	PPH1		Hawaii	9	6649202	53	260.037	PPH_1	412341	21.9291	153901	148235	172297	0.23549	412343	163753	0.397128	10828
Achatinellinae	Partulina	proxima	Pa. proxima 1	PPR1		Molokai	6	4643158	40	281.051	PPR_1	412264	39.5614	151138	147467	162992	0.23647	412343	174840	0.424016	14519
Achatinellinae	Partulina	proxima	Pa. proxima 2	PPR2		Molokai	4	3806748	40	274.927	PPR_2	412208	33.1579	144236	140779	155615	0.23302	412343	184176	0.446657	13966
Achatinellinae	Partulina	proxima	Pa. proxima 3	PPR3		Molokai	6	5645806	48	249.016	PPR_3	412343	19.3461	172150	171395	197824	0.02857	412343	129147	0.313203	12515
Achatinellinae	Partulina	redfieldi	Pa. redfieldi 1	PRE1		Molokai	50	2749370	40	242.025	PRE_1	412255	30.5126	130277	127068	140552	0.23796	412343	203990	0.49471	16915
Achatinellinae	Partulina	redfieldi	Pa. redfieldi 2	PRE2		Molokai	10	4040244	40.5	277.919	PRE_2	412264	36.4237	145805	141758	156683	0.27118	412343	183649	0.445379	11989
Achatinellinae	Partulina	redfieldi	Pa. redfieldi 3	PRE3		Molokai	50	4059102	40	277.491	PRE_3	412128	36.5321	149305	145414	160630	0.25571	412343	178252	0.432291	12967
Achatinellinae	Partulina	redfieldi	Pa. redfieldi 4	PRE4		Molokai	50	5151524	40.5	273.821	PRE_4	412146	47.4852	159718	155692	172041	0.24623	412343	163302	0.396034	13450
Achatinellinae	Partulina	semicarinata	Pa. semicarinata	PSE1		Lanai	24	4411370	48.5	248.519	PSE_1	412340	16.1826	151033	153297	177875	-0.09212	412343	156736	0.380111	15757
Achatinellinae	Partulina	tesselata	Pa. tesselata	PTE1		Molokai	9	5858984	41	271.979	PTER_1	412262	48.6812	156258	153195	169434	0.18863	412343	166462	0.403698	12098
Achatinellinae	Partulina	variabilis	Pa. variabilis	PVA1		Lanai	18	5189316	40.5	252.005	PVA_11	412264	52.2316	150490	146858	162337	0.23466	412343	173563	0.420919	14538
Auricullelinae	Auriculella	crassula	Auriculella crassula	ACR1		Oahu	10	4326006	41.3	280.2	ACR_1	409150	26.2642	21970	21414.3	23755	0.23741	412343	374910	0.909219	14649
Auricullelinae	Auriculella	pulchra	Auriculella pulchra	AUR1		Oahu	1	4782886	41	282.899	AU_R1	411060	25.4276	24280	23635.2	26086	0.26309	412343	371245	0.900331	10089
Tornatellidinae	Tornatellides	irregularis	Tornatellides irregularis	TIR1		Maui	9	5027094	42	268.979	TIR_1	409174	19.1327	11169	10695.5	11998	0.36352	412343	394129	0.955828	12856

## Sheet: scratchpad
												vcftools TotalRawSNPs.vcf										vcftools --depth manualcoustom.vcf					totalrawvcf(ACo1nul removed)					manualcoustom(ACO1null removed)					Totalraw(lowmissing_T20L60)					Manualcoustom(lowmissing_T20L60)
Subfamily	Genus	Species	Code	ESU	Island	Location	Latitude	Longitude	Totalreads	GC	read_lngth	INDV	N_SITES	MEAN_DEPTH	O(HOM)	E(HOM)	N_SITES	F	N_DATA	N_MISS	F_MISS	N_SITES	MEAN_DEPTH	N_DATA	N_MISS	F_MISS	TW_PC1	TW_PC2	TW_PC3	TW_PC4	TW_PC5	MC_PC1	MC_PC2	MC_PC3	MC_PC4	MC_PC5	TRT20L60_PC1	TRT20L60_PC2	TRT20L60_PC3	TRT20L60_PC4	TRT20L60_PC5	MCT20L60_PC1	MCT20L60_PC2	MCT20L60_PC3	MCT20L60_PC4	MCT20L60_PC5
Achatinellinae	Achatinella	apexfulva	AAP1		Oahu	Lab pop (Poamoho)			8119538	31.5	276.753	AAP_1	412282	9.23474	93992	89691.8	107462	0.24199	412343	254859	0.618075	142031	13.3884	434848	292817	0.673378	28.6696	6.79992	3.17839	9.33114	11.4097	32.6095	6.80714	-15.835	14.1962	10.4989	8.95774	13.9227	-8.99256	30.4579	16.578	2.09822	20.3571	9.4221	19.9212	5.41692
Achatinellinae	Achatinella	bulimoides	ABU1		Oahu	Lab pop (Poamoho)			6529944	50.5	244.872	ABU_1	412343	22.3105	160706	155824	180921	0.19452	412343	152468	0.36976	255255	26.7324	434848	179593	0.413002	25.6577	16.4472	18.4915	2.48723	19.4513	22.6336	11.0323	-38.9511	8.45043	15.0653	10.8852	12.2452	1.82183	10.4277	-14.8733	4.5791	20.1086	-2.35271	12.9422	-1.00572
Achatinellinae	Achatinella	byroni	ABY1		Oahu	Schofield-Waikane			4978746	41.1	231.1	ABY_1	412267	59.8057	164268	162760	179919	0.08788	412343	151437	0.36726	285213	64.3305	434848	149635	0.344109	-9.4469	9.27919	-2.20869	-30.1189	2.59385	-9.44992	11.7023	-3.69891	-39.8375	1.87267	3.56011	-1.89723	12.9633	-2.28722	1.3801	6.69635	0.90683	-16.9224	-5.19119	2.03954
Achatinellinae	Achatinella	concavospira	ACO1		Oahu	slime swabs of temporary lab pop			4562818	41.7	279.5	ACO1	412265	39.907	155334	152224	168211	0.19451	412343	169855	0.411926	266716	66.8916	434848	168132	0.386645	-15.8697	5.95851	-5.99304	3.56619	-0.766241	-20.7479	8.07647	7.44444	1.58255	1.81047	0.219452	-8.90008	0.68093	3.93402	1.7375	5.6437	-9.3996	-1.79537	4.52653	1.91261
Achatinellinae	Achatinella	concavospira	ACO2		Oahu	field samples (2)			4145876	41.7	204.4	ACO_2	412267	64.2208	145521	143594	158918	0.12576	412343	176202	0.427319	257850	55.0746	434848	176998	0.407034	-6.76483	10.4943	-7.4982	-0.37858	-0.429695	-6.09551	15.5202	6.69899	-3.03024	-1.94483	6.61244	-1.37478	-0.383942	-7.22204	4.94766	8.04429	2.28737	1.95964	-13.46	8.60028
Auricullelinae	Auriculella	crassula	ACR1						4326006	41.3	280.2	ACR_1	409150	26.2642	21970	21414.3	23755	0.23741	412343	374910	0.909219	22467	56.1123	434848	412381	0.948334	58.4794	-21.3724	-59.922	0.0510227	6.97913	105.405	7.7066	59.5714	-4.48499	14.2931
Achatinellinae	Achatinella	decipiens	ADE1		Oahu	PD1-PD6			7054168	41	274.051	ADE_1	412282	62.7232	171988	169318	187187	0.14944	412343	145164	0.352047	291928	95.3456	434848	142920	0.328667	-13.5329	6.60282	-2.05054	-29.4297	3.07028	-16.7302	6.3464	-2.30373	-38.7199	3.83946	1.66902	-5.31036	12.6323	3.44376	0.0459857	5.48768	-3.77762	-17.5761	4.35786	-1.86729
Achatinellinae	Achatinella	decipiens	ADE2		Oahu	Lab pop			4035250	40.9	189.1	ADE_2	412343	19.8702	139522	147136	171351	-0.31444	412343	162878	0.395006	235530	20.1377	434848	199318	0.458362	55.5343	24.0661	14.2285	1.16227	2.17662	58.391	20.8797	-29.2489	6.48234	0.45018	15.089	17.7757	0.180464	-6.56362	26.0725	6.15456	27.8367	2.15127	0.672398	16.434
Achatinellinae	Achatinella	decipiens	ADE3		Oahu	Kaluanui 1-28			4468278	41.2	192.7	ADE_3	412243	44.0246	129244	127765	141353	0.10887	412343	195996	0.475323	230817	48.1143	434848	204031	0.469201	2.53348	11.535	-3.82575	-20.1953	5.02105	9.57833	15.6417	-8.40523	-23.1603	0.812356	11.7532	7.89696	5.30882	-9.1424	1.03301	8.28838	16.2711	-4.99061	-17.5672	1.35004
Achatinellinae	Achatinella	decipiens	ADE4		Oahu	Kaluanui 29-40			5594312	40.8	191.2	ADE_4	412267	50.2141	136731	135511	149917	0.08467	412343	185123	0.448954	243986	52.9848	434848	190862	0.438917	2.30989	12.1494	-3.27055	-21.703	5.03262	7.5961	15.9869	-8.21716	-27.0737	0.428	11.3156	6.91857	7.43212	-7.95691	1.37218	8.38074	13.8408	-7.97385	-14.6808	1.82593
Achatinellinae	Achatinella	decipiens	ADE5		Oahu	Kaluanui 41-45			7054168	41.1	275.6	ADE_5	412262	56.1125	138347	137011	151694	0.09099	412343	182837	0.44341	246191	61.2353	434848	188657	0.433846	2.94703	12.5908	-3.05371	-23.0742	4.01869	8.74963	16.2148	-8.75941	-28.2261	-0.990113	11.207	7.38741	6.17462	-8.67355	0.315386	8.71733	14.3126	-7.0379	-15.9673	0.616399
Achatinellinae	Achatinella	fulgens	AFUL1		Oahu	Kului Gulch			5706416	47.5	233.758	AFUL_1	412343	26.3741	195537	190032	218868	0.1909	412343	100958	0.24484	317940	33.1118	434848	116908	0.268848	17.7106	17.2867	20.1664	-0.142281	12.7098	12.622	11.3849	-39.23	4.51854	6.52566	7.79188	7.3994	2.16767	-5.0256	-7.17874	4.99033	13.3392	-1.63415	-6.885	-5.23953
Achatinellinae	Achatinella	fulgens	AFUL2		Oahu	Pia Valley			6435940	48	216.105	AFUL_2	412343	29.6982	183043	178302	206077	0.1707	412343	114850	0.27853	298668	33.7771	434848	136180	0.313167	24.1182	19.9948	21.058	1.15015	18.7021	21.8549	13.8053	-43.0172	9.12553	8.92337	10.595	11.458	-0.547428	-9.70304	-7.92994	5.20943	17.4848	2.35768	-11.7568	-5.93438
Achatinellinae	Achatinella	fuscobasis	AFUS1		Oahu	Lab pop			5337352	45	237.38	AFUS_1	412339	23.8626	171329	185280	212834	-0.5063	412343	107700	0.26119	309226	29.7554	434848	125622	0.288887	44.7569	16.2567	4.47656	-11.0797	-101.401	41.6024	16.0691	0.494989	-10.246	-123.028	6.75959	7.02636	0.667206	-4.32179	-7.73067	3.5907	11.4302	0.550085	-7.47703	-2.98904
Achatinellinae	Achatinella	lila	ALI1		Oahu	Field - Poamoho			8407198	41.5	300.845	ALI_1	412241	31.8176	114315	111661	123523	0.22374	412343	225969	0.548012	190977	75.3948	434848	243871	0.560819	-3.78192	3.60017	-2.79425	-9.82171	4.81661	-1.96791	3.46416	-4.14208	-11.5657	6.51682	4.54535	2.55051	6.75916	9.2335	-3.92567	3.15996	6.64452	-8.1593	17.2386	-4.35372
Achatinellinae	Achatinella	lila	ALI2		Oahu	Field - 290 Windward			5246316	40	272.239	ALI_2	412282	47.0236	156635	153486	169610	0.19529	412343	164771	0.399597	272044	82.078	434848	162804	0.374393	-9.91717	6.14921	0.119742	-22.3805	2.63573	-10.1646	6.93714	-5.7248	-30.365	3.84641	3.31105	-1.08504	10.8332	2.79848	-4.05812	5.36727	1.58783	-14.9106	4.49443	-5.51081
Achatinellinae	Achatinella	lila	ALI3		Oahu	Captive - Poamoho - morgue			7618686	48	256.561	ALI_3	412298	28.9682	176587	171959	199050	0.17085	412343	127772	0.309868	284793	37.2432	434848	150055	0.345075	25.1485	21.0726	22.276	-3.44672	3.20384	20.9109	13.1726	-43.3219	3.1209	-0.956178	10.4588	8.94116	4.96262	2.82044	-8.78083	5.51559	16.8696	-6.24373	8.22648	-8.79056
Achatinellinae	Achatinella	livida	ALIV1		Oahu	Lab pop			7095932	51.3	190.3	ALIV_1	412343	25.3409	160332	164711	190927	-0.16702	412343	136610	0.331302	269182	23.4453	434848	165666	0.380975	46.1503	26.0624	25.1737	-0.0325486	6.69917	42.1128	19.4779	-43.6105	6.42755	-1.73858	12.5167	13.285	0.964697	-7.89116	15.6442	6.75764	21.1229	1.94212	-5.67933	4.87202
Achatinellinae	Achatinella	mustelina	AMU_1	ESUA	Oahu	Kahanahaiki			6246584	44	278.006	AMU_1	412267	52.7169	171492	166934	184583	0.25826	412343	147237	0.357074	292400	91.7632	434848	142448	0.327581	-21.1765	8.50642	-6.59289	15.0778	-3.50624	-28.9074	13.4362	13.1828	16.3153	-1.13768	0.270141	-11.4773	-3.50294	1.68303	0.610854	7.48143	-13.5237	5.00364	2.22459	5.0041
Achatinellinae	Achatinella	mustelina	AMU_10	ESUD	Oahu	Makaha			3045848	40.5	284.163	AMU_10	412267	37.6328	133286	129797	143673	0.25143	412343	195776	0.474789	236026	55.0172	434848	198822	0.457222	-10.6932	9.37469	-5.27548	11.7527	0.0437408	-10.7449	14.5209	4.88701	16.2769	-0.881462	7.22475	-2.1236	-9.94812	-3.73306	-3.39747	9.42992	1.70546	13.8861	-4.76556	-5.40427
Achatinellinae	Achatinella	mustelina	AMU_11	ESUD	Oahu	Puu Hapapa			3518746	41	229.545	AMU_11	412267	38.0558	138456	135410	149896	0.21029	412343	188569	0.457311	243439	56.608	434848	191409	0.440174	-10.2851	9.20021	-5.95735	12.3011	-0.312742	-11.6603	15.693	5.11897	16.4327	-0.927197	6.88487	-2.38626	-10.5297	-1.4327	-6.06941	9.55017	1.33176	13.2117	-0.608283	-13.4895
Achatinellinae	Achatinella	mustelina	AMU_12	ESUD	Oahu	Puu Kalena			2354794	40	234.564	AMU_12	412267	31.0143	144889	141462	156410	0.22927	412343	182152	0.441749	254082	44.0156	434848	180766	0.415699	-15.2533	8.56739	-7.47184	14.1316	-1.93911	-19.7422	13.8906	9.64561	17.1222	0.188212	4.32444	-7.92097	-9.17952	-1.92754	-2.18079	8.85438	-5.7155	11.8886	1.10208	-12.0614
Achatinellinae	Achatinella	mustelina	AMU_13	ESUD	Oahu	Puu Kumakalii			3182792	40	235.946	AMU_13	412267	39.5063	156481	153086	169383	0.20835	412343	165134	0.400477	272692	51.6633	434848	162156	0.372903	-16.4059	10.0577	-7.7706	14.3552	-1.96005	-20.6318	16.1524	11.6217	17.4419	-0.01986	4.46885	-8.12777	-8.00854	-2.98223	-0.971042	10.1089	-7.11469	11.3272	-2.70459	-9.34001
Achatinellinae	Achatinella	mustelina	AMU_14	ESUE	Oahu	Ekahanui			2965040	41	230.076	AMU_14	412267	35.0797	136706	133597	147767	0.21938	412343	191316	0.463973	241970	52.7862	434848	192878	0.443553	-9.60139	8.90976	-5.7048	11.7307	0.281137	-12.3265	14.1118	3.54591	15.1399	1.11094	7.06535	-2.88204	-10.6733	-3.09827	-5.08985	9.7701	0.829243	13.483	-2.87855	-11.0892
Achatinellinae	Achatinella	mustelina	AMU_15	ESUF	Oahu	Palikea			2374954	40	232.936	AMU_15	412267	31.048	143278	139857	154644	0.23133	412343	185572	0.450043	251790	45.4549	434848	183058	0.42097	-14.1125	7.06345	-6.48807	11.6004	-0.332277	-17.285	11.0512	8.95123	14.1384	1.14121	3.92415	-7.01606	-9.16916	-0.0988539	-2.84879	8.18722	-5.89308	11.3014	1.1672	-15.2157
Achatinellinae	Achatinella	mustelina	AMU_16	ESUE	Oahu	H1-H4 (Huliwai)			5774984	40	241.165	AMU_16	412278	54.435	170982	167497	185306	0.19571	412343	145791	0.353567	294199	81.118	434848	140649	0.323444	-18.3219	9.0901	-6.45099	11.7863	-3.17045	-25.1828	13.4811	11.1815	11.5714	-1.05128	1.38625	-9.43208	-2.90828	0.476866	0.851532	7.35331	-11.1785	3.50678	0.899088	2.11388
Achatinellinae	Achatinella	mustelina	AMU_17	ESUE	Oahu	NH1-NH4			3809330	40	276.658	AMU_17	412264	45.6761	147085	143536	158657	0.23471	412343	179954	0.436418	252916	53.1266	434848	181932	0.418381	-14.5163	7.42237	-6.87583	9.50824	-0.758319	-19.4206	11.3678	8.75137	11.6433	1.63403	3.0752	-8.39391	-4.02874	1.49464	3.21847	7.37878	-8.22413	5.16754	3.31634	3.09258
Achatinellinae	Achatinella	mustelina	AMU_18	ESUD	Oahu	K1-K6			5362324	41.5	269.657	AMU_18	412167	96.2958	138404	134979	149181	0.24118	412343	192890	0.46779	240397	91.6426	434848	194451	0.44717	-13.4601	6.04395	-7.72358	11.0787	-0.339883	-17.5912	10.0455	8.96233	12.9255	3.23125	2.66901	-7.67634	-7.41704	5.47324	4.63473	6.50881	-7.65522	7.12294	12.846	1.8978
Achatinellinae	Achatinella	mustelina	AMU_19	ESUD	Oahu	S1-S6			5633994	41.5	276.283	AMU_19	412263	129.437	138074	134318	148479	0.26523	412343	195404	0.473887	237990	53.813	434848	196858	0.452705	-14.8216	6.01251	-6.98107	10.874	-0.542772	-19.2565	10.2201	8.93611	13.4134	2.97141	0.586113	-9.19146	-3.99187	5.14116	2.76013	5.78615	-9.18129	5.2331	9.68474	2.83174
Achatinellinae	Achatinella	mustelina	AMU_2	ESUA	Oahu	Pahole			6423834	41	276.644	AMU_2	412267	57.6288	165931	161984	179152	0.22991	412343	152223	0.369166	285705	89.6142	434848	149143	0.342977	-18.2188	10.7808	-6.42696	13.8638	-2.9736	-24.682	16.1133	11.3592	15.9306	-1.82556	2.74412	-8.79387	-3.38124	-0.687596	0.447012	8.54678	-9.72274	5.28766	-0.940346	6.8437
Achatinellinae	Achatinella	mustelina	AMU_20	ESUB	Oahu	Kaawa 1-13			5308080	41	273.694	AMU_20	412149	55.9968	175423	171546	189606	0.21465	412343	140776	0.341405	300570	79.7258	434848	134278	0.308793	-21.4826	9.9774	-7.06711	14.1395	-3.26746	-28.7587	14.9789	14.013	14.7091	-1.83433	0.541385	-11.9572	-2.18842	0.196854	2.12878	8.10196	-13.8295	3.52327	-0.97605	6.64279
Achatinellinae	Achatinella	mustelina	AMU_21	ESUD	Oahu	MAK-G 1-15			4931932	41	268.732	AMU_21	412267	51.5863	174647	170822	188888	0.21171	412343	141577	0.343348	300615	74.1438	434848	134233	0.308689	-22.0262	9.43267	-7.07769	14.7516	-3.38519	-29.3956	14.6097	15.0953	15.2619	-1.09272	0.264504	-12.4669	-3.0449	-0.000969557	2.59963	7.7288	-15.0174	3.30616	0.520685	7.67228
Achatinellinae	Achatinella	mustelina	AMU_22	ESUD	Oahu	MAK-F 1-7			4462150	41	270.571	AMU_22	412264	46.3411	164849	161007	177966	0.22656	412343	155105	0.376155	284700	73.5047	434848	150148	0.345288	-20.2935	9.24993	-6.85987	13.6555	-2.91222	-26.4391	14.271	12.3701	14.7276	0.0743146	0.932482	-11.2746	-3.37601	0.895814	1.50608	7.78984	-12.667	3.98325	1.13412	5.87859
Achatinellinae	Achatinella	mustelina	AMU_3	ESUB	Oahu	Koiahi			5571576	40.5	280.512	AMU_3	412267	46.5337	156283	152186	168185	0.25607	412343	166601	0.404035	269935	83.1418	434848	164913	0.379243	-17.2011	9.41334	-5.15076	13.2263	-1.19792	-22.7003	14.3645	9.25076	14.8095	-0.470565	2.58846	-7.31698	-4.61005	0.476405	-0.81744	8.1639	-8.07991	6.28228	0.213902	5.96397
Achatinellinae	Achatinella	mustelina	AMU_4	ESUB	Oahu	Ohikilolo			7710220	41	228.319	AMU_4	412267	75.269	169237	167170	184984	0.11602	412343	144049	0.349343	293315	82.9783	434848	141533	0.325477	-15.4172	14.1274	-7.67711	14.2274	-3.22381	-18.7487	20.7888	11.6411	13.5395	-3.46519	5.0301	-6.33693	-3.87635	-4.62586	1.6807	9.74054	-6.32331	5.51456	-6.93973	8.66677
Achatinellinae	Achatinella	mustelina	AMU_5	ESUB	Oahu	Culvert 39			6380944	41	249.935	AMU_5	412267	59.4759	170073	166963	184672	0.17563	412343	144818	0.351208	293725	76.8763	434848	141123	0.324534	-17.8321	12.7766	-7.11467	14.562	-3.39187	-23.5563	19.2687	12.5558	15.3374	-2.16938	3.80244	-7.83343	-3.99072	-2.62285	1.66467	9.27089	-8.68973	5.54628	-4.09698	9.16429
Achatinellinae	Achatinella	mustelina	AMU_6	ESUB	Oahu	Culvert 56/57			5202138	40.5	281.253	AMU_6	412267	48.3446	168861	164671	181944	0.24257	412343	150607	0.365247	287946	79.2622	434848	146902	0.337824	-21.1083	9.20613	-6.82246	14.2779	-3.17474	-28.871	14.0069	13.2316	14.941	-0.429245	0.232177	-12.0033	-3.76113	1.84403	1.67477	7.84237	-14.112	3.89632	2.62604	5.95132
Achatinellinae	Achatinella	mustelina	AMU_7	ESUC	Oahu	Skeet Pass			5901776	41	268.908	AMU_7	412267	55.1887	165967	162486	179596	0.20345	412343	151933	0.368463	287089	80.8548	434848	147759	0.339795	-17.8418	10.697	-6.88563	13.0921	-2.90925	-23.3719	16.0963	11.7681	13.6572	-2.47843	2.62583	-9.07251	-3.61707	-0.845556	1.03472	8.61065	-9.91042	4.69295	-2.07246	5.31839
Achatinellinae	Achatinella	mustelina	AMU_8	ESUC	Oahu	Haleauau			6503420	41	246.91	AMU_8	412267	61.7657	174132	171172	189366	0.16271	412343	139363	0.337978	299238	78.2235	434848	135610	0.311856	-18.9253	12.0635	-7.48412	13.2806	-3.49751	-25.1319	17.9205	13.2691	13.0316	-1.91897	3.02013	-9.12029	-3.00627	-2.9321	3.13196	8.74789	-10.7884	3.79226	-3.98565	7.32628
Achatinellinae	Achatinella	mustelina	AMU_9	ESUD	Oahu	SBW-R			3346192	40	238.062	AMU_9	412267	35.55	133185	129914	143760	0.23622	412343	197145	0.478109	234749	59.0582	434848	200099	0.460158	-10.1199	8.09136	-6.30441	13.1452	-0.0496513	-12.4449	13.8802	5.42663	17.5855	0.855854	5.8808	-2.57266	-11.5234	-1.46211	-5.85087	9.21096	-0.129841	13.704	1.51803	-12.1229
Achatinellinae	Achatinella	sowerbyana	ASO1		Oahu	Poamoho Summit			5737666	40	279.604	ASO_1	412282	53.5422	170465	167823	185469	0.14973	412343	146188	0.35453	292487	96.1508	434848	142361	0.327381	-14.1539	6.66414	-1.60287	-31.3461	3.36728	-17.3343	7.09652	-2.25968	-42.0064	5.40501	0.208763	-5.82434	14.6172	4.25895	-1.28374	4.48174	-5.0423	-20.3103	4.59304	-3.38989
Achatinellinae	Achatinella	sowerbyana	ASO2		Oahu	290 Windward			4851700	40	274.9	ASO_2	412282	46.6596	163614	160756	177688	0.16878	412343	155457	0.377009	282973	80.9635	434848	151875	0.34926	-12.8268	6.95518	-1.45493	-30.2006	3.77794	-15.0917	8.22949	-4.43376	-40.3511	6.03549	1.40616	-4.41518	14.287	3.95361	-2.32561	5.39521	-2.72009	-18.9952	3.80808	-3.71261
Achatinellinae	Achatinella	sowerbyana	ASO3		Oahu	290 Summit/Peahinaia			4657426	40	273.434	ASO_3	412267	42.1185	153287	150268	166074	0.19099	412343	169495	0.411053	264976	75.3172	434848	169872	0.390647	-10.8781	7.10192	-0.720033	-26.5701	3.23949	-12.2779	8.42579	-5.14243	-34.4967	5.12647	3.13606	-1.80364	11.8707	1.96343	-3.178	5.68829	0.272958	-15.7311	2.24991	-5.20958
Achatinellinae	Achatinella	sowerbyana	ASO4		Oahu	Poamoho Trail			4635484	40	276.36	ASO_4	412281	44.3909	161604	158765	175451	0.17014	412343	158833	0.385196	279088	73.8236	434848	155760	0.358194	-13.3563	6.15181	-2.11647	-30.0741	2.87781	-15.6046	7.5175	-1.98826	-39.7406	5.59652	0.833543	-5.28141	14.7669	3.80356	-1.57069	6.00158	-4.13812	-19.5362	4.03988	-4.30152
Achatinellinae	Achatinella	sowerbyana	ASO5		Oahu	Hypalon			4429486	40.5	260.663	ASO_5	412267	46.6379	160905	158518	175154	0.14347	412343	158076	0.38336	280810	66.3318	434848	154038	0.354234	-13.0151	6.22044	-2.19111	-29.8105	3.11776	-15.5178	8.36	-1.82444	-38.2625	5.32298	1.6371	-4.44912	13.7967	1.95085	-0.375636	5.16267	-3.813	-18.4372	0.87541	-1.91237
Achatinellinae	Achatinella	sowerbyana	ASO6		Oahu	Opaeula			5235580	41	264.367	ASO_6	412282	51.6869	163579	161027	177975	0.15057	412343	154889	0.375631	283372	75.4721	434848	151476	0.348342	-13.3614	7.03296	-2.46494	-30.8793	3.46316	-14.5252	8.57276	-2.10908	-42.9749	6.07483	1.52409	-5.02199	14.3594	1.87227	-0.39728	5.96233	-4.05011	-19.8794	1.80066	-1.99133
Achatinellinae	Achatinella	sowerbyana	ASO7		Oahu	field sample (1)			82778	42.7	233.2	ASO_7	411218	4.74954	22064	21762.2	24360	0.11618	412343	373359	0.905457	35616	5.98846	434848	399232	0.918096	13.0473	-4.16937	-14.6916	1.43184	5.29275	17.5514	1.10824	3.61484	4.00812	9.73711
Auricullelinae	Auriculella	sp.	AUR1		Oahu	Poamoho			4782886	41	282.899	AU_R1	411060	25.4276	24280	23635.2	26086	0.26309	412343	371245	0.900331	22681	88.1731	434848	412167	0.947842	65.1474	-23.9495	-66.8132	-0.494495	7.53852	123.542	9.02294	70.6468	-6.93767	14.9562
Achatinellinae	Achatinella	sp. Oahu	AUN1		Oahu	Poamoho unknown snail			5226018	41	269.792	AUN_1	412147	65.1177	132657	129003	142544	0.26983	412343	201853	0.489527	229722	88.0694	434848	205126	0.471719	-8.17208	1.30869	-3.77805	-7.72449	1.60631	-9.59335	0.996625	-0.715978	-9.86271	4.94058	1.3571	-2.75957	5.51436	9.0316	-1.24755	2.28796	-0.0195785	-6.01269	13.5284	-1.71315
Achatinellinae	Newcombia	cumingi	NCU1		Maui	Lab pop			6519964	39	255.936	NCU_1	412280	74.6825	136428	130650	151189	0.2813	412343	194378	0.471399	210544	68.5273	434848	224304	0.515822	25.5987	-1.93116	13.1791	11.6098	14.5653	24.6375	-7.32776	-22.3642	16.4523	14.328	-1.6978	16.091	-7.34135	16.2866	-5.10888	-10.2912	17.8087	9.84813	16.1381	3.14405
Achatinellinae	Perdicella	sp. Maui	PER1		Maui	Hanaula (above windfarm)			4951340	41	279.534	PE_R1	412211	45.2268	146240	141700	156719	0.3023	412343	183357	0.444671	250210	90.0601	434848	184638	0.424604	-6.21913	-21.7922	4.39939	-1.9478	-2.10588	-5.22511	-30.1465	4.76735	-2.27358	-1.22471	-14.1115	1.80429	1.68439	-0.299626	3.30987	-17.4669	-4.71565	-2.63358	-1.42891	6.57084
Achatinellinae	Perdicella	helena	PHE1		Molokai	ph3-PH38			3675944	40	285.052	PHE_1	412282	31.4931	131281	127433	141055	0.2825	412343	204222	0.495272	227671	73.3838	434848	207177	0.476435	-3.63536	-28.3453	8.36859	-0.197444	-2.52108	-3.11435	-37.3801	2.86665	1.19289	-0.567804	-14.9239	4.44362	1.08241	1.32699	-0.13407	-19.7677	-3.79383	-0.984071	2.60815	4.03638
Achatinellinae	Perdicella	helena	PHE2		Molokai	PAP01-PAP31			4074556	40	281.168	PHE_2	412262	37.4596	138646	134584	148857	0.28462	412343	193230	0.468615	239050	78.011	434848	195798	0.450268	-4.71984	-30.991	9.79371	-0.976425	-3.68162	-4.53792	-40.7928	3.97677	0.218742	-1.42774	-16.0172	3.73608	1.88215	-0.594036	2.23255	-20.4936	-4.29945	-1.89914	0.0280604	4.09254
Achatinellinae	Partulina	mighelsiana	PMI1		Molokai	PAM01-PAM60			4524560	40	270.927	PMI_1	412267	41.9774	150330	146840	162247	0.22649	412343	174732	0.423754	260095	77.28	434848	174753	0.401871	-6.07551	-19.8366	4.25618	-3.0427	-3.2979	-6.2736	-27.3089	4.35964	-3.87892	-2.97528	-11.4028	0.918841	2.24595	-2.26175	2.51265	-14.6504	-4.61119	-2.4287	-4.12133	3.32053
Achatinellinae	Partulina	perdix	PPE1		Maui	Lab pop			6311830	41	265.791	PPE_1	412341	23.2176	179465	173302	198799	0.24173	412343	127006	0.308011	290844	44.7205	434848	144004	0.331159	14.011	-15.1142	17.5691	11.2196	23.6563	11.8803	-25.3355	-18.5481	13.8025	22.9928	-5.73136	10.9278	-5.81042	-3.21535	-6.78581	-14.9114	9.16351	6.3414	-1.78479	-2.17714
Achatinellinae	Partulina	perdix	PPE2		Maui	13MAU - Hanaula			4202976	40	284.145	PPE_2	412170	36.5634	131050	127407	140862	0.27077	412343	204890	0.496892	226357	88.3476	434848	208491	0.479457	-5.05369	-25.7663	7.85952	1.12243	-0.156483	-4.65026	-35.4402	1.80229	2.43029	1.62898	-14.1062	4.62289	-1.27666	1.44663	0.662654	-19.46	-2.18065	0.565511	5.59432	1.30629
Achatinellinae	Partulina	physa	PPH1		Hawaii	Lab pop			6649202	53	260.037	PPH_1	412341	21.9291	153901	148235	172297	0.23549	412343	163753	0.397128	243384	33.9043	434848	191464	0.440301	24.7363	-2.20772	19.4302	11.2451	10.263	23.3872	-10.4814	-27.1338	18.0867	8.97429	-3.53373	17.0903	-7.99452	1.19923	-8.10344	-13.8789	16.9549	9.64424	8.36303	6.85827
Achatinellinae	Partulina	proxima	PPR1		Molokai	pp5-pp10			4643158	40	281.051	PPR_1	412264	39.5614	151138	147467	162992	0.23647	412343	174840	0.424016	259960	84.8376	434848	174888	0.402182	-7.04429	-30.6827	12.106	0.0450726	-4.31382	-7.11897	-43.1129	3.59648	0.0860181	-4.7467	-15.781	1.79548	1.46362	-1.05977	0.790144	-19.5161	-6.83952	-1.80411	-2.16224	3.74321
Achatinellinae	Partulina	proxima	PPR2		Molokai	pp1-pp4			3806748	40	274.927	PPR_2	412208	33.1579	144236	140779	155615	0.23302	412343	184176	0.446657	250221	67.0799	434848	184627	0.424578	-6.3705	-29.1708	10.9455	-0.937542	-4.29639	-6.00453	-38.8058	3.42512	-1.71977	-4.24284	-14.155	2.2086	0.912408	-2.21017	0.826827	-18.5281	-6.38561	-1.4402	-2.94051	2.49783
Achatinellinae	Partulina	proxima	PPR3		Molokai	pp11-pp16			5645806	48	249.016	PPR_3	412343	19.3461	172150	171395	197824	0.02857	412343	129147	0.313203	284566	30.2353	434848	150282	0.345597	34.7229	-2.72466	33.7156	13.5753	-4.16594	29.5933	-17.1199	-37.2672	22.0361	-8.01696	-7.23767	12.1482	-4.47867	-3.81865	-0.28702	-15.5126	9.82873	6.48294	-1.1316	3.82612
Achatinellinae	Partulina	redfieldii	PRE1		Molokai	mixed			2749370	40	242.025	PRE_1	412255	30.5126	130277	127068	140552	0.23796	412343	203990	0.49471	228789	53.2857	434848	206059	0.473864	-5.46352	-27.903	8.47839	4.45308	-1.78126	-3.03991	-36.6711	4.21433	6.15084	-3.12077	-10.2233	4.47998	-8.34982	-3.37555	-2.63083	-15.8667	-0.144758	8.19944	-4.3028	-24.0232
Achatinellinae	Partulina	redfieldii	PRE2		Molokai	pr1-pr3,PR33-PR39			4040244	40.5	277.919	PRE_2	412264	36.4237	145805	141758	156683	0.27118	412343	183649	0.445379	250988	73.103	434848	183860	0.422814	-7.7931	-36.2728	13.3126	-0.469906	-4.16421	-6.50572	-48.723	4.80904	-0.228865	-5.04839	-16.788	2.456	0.399805	-2.86624	1.83533	-22.0438	-6.30552	-0.771556	-4.60322	-8.08412
Achatinellinae	Partulina	redfieldii	PRE3		Molokai	pr4-pr32,PR40-PR88,F2-F16			4059102	40	277.491	PRE_3	412128	36.5321	149305	145414	160630	0.25571	412343	178252	0.432291	256929	71.5276	434848	177919	0.409152	-7.74188	-37.1073	13.5994	-0.600452	-4.09171	-6.82108	-49.2474	4.24973	0.0142208	-6.22952	-16.5402	2.91627	0.649421	-2.12919	2.73869	-20.1654	-6.11689	-1.67065	-4.88595	-8.81502
Achatinellinae	Partulina	redfieldii	PRE4		Molokai	PR89-PR138			5151524	40.5	273.821	PRE_4	412146	47.4852	159718	155692	172041	0.24623	412343	163302	0.396034	273848	81.789	434848	161000	0.370244	-8.63579	-39.3625	15.0211	-1.55148	-4.68753	-8.45092	-53.6318	5.30891	-1.36801	-6.43307	-15.6988	1.99592	1.08562	-3.05896	2.24076	-20.6477	-6.21788	-1.11901	-5.52182	-7.75305
Achatinellinae	Partulina	semicarinata	PSE1		Lanai	lab			4411370	48.5	248.519	PSE_1	412340	16.1826	151033	153297	177875	-0.09212	412343	156736	0.380111	254022	23.2881	434848	180826	0.415837	41.7229	6.84471	24.9218	12.3985	-4.57894	38.5972	-4.20892	-35.328	20.5524	-8.23466	-1.93995	12.0968	-5.86582	0.573264	-4.67399	-8.3088	12.9645	6.95266	1.12244	10.38
Achatinellinae	Partulina	tesselata	PTE1		Molokai	PAT01-PAT09			5858984	41	271.979	PTER_1	412262	48.6812	156258	153195	169434	0.18863	412343	166462	0.403698	269572	90.6755	434848	165276	0.380078	-6.26247	-31.5756	11.2669	0.044295	-2.54108	-6.05971	-42.96	4.3494	-0.447511	-2.06445	-14.1802	2.69228	0.427767	-2.59947	2.91994	-18.2796	-5.60024	-0.894463	-3.45105	2.53203
Achatinellinae	Partulina	terebra	PTER1		Maui	above windmills			3834086	40	284.33	PTES_11	412128	32.6923	140366	137143	151467	0.22498	412343	190297	0.461502	245355	73.8856	434848	189493	0.435768	-7.13216	-19.4298	4.57155	-1.06879	-2.18677	-6.24131	-29.1524	4.22686	-1.52725	-1.3247	-13.0071	1.22813	0.592785	-0.624655	-0.598116	-16.2438	-5.5642	-1.46749	-0.710323	-0.423726
Achatinellinae	Partulina	variabilis	PVA1		Lanai	Lanai (combined)			5189316	40.5	252.005	PVA_11	412264	52.2316	150490	146858	162337	0.23466	412343	173563	0.420919	259237	76.0727	434848	175611	0.403845	-4.75737	-18.4945	7.0598	-2.72086	-2.59372	-3.91725	-25.0313	1.49849	-3.59908	-3.93491	-9.81589	3.03974	1.58634	-5.11449	3.26369	-11.7922	-1.76743	-1.46631	-8.70462	8.1765
Tornatellidinae	Tornatellides	irregularis	TIR1		Maui				5027094	42	268.979	TIR_1	409174	19.1327	11169	10695.5	11998	0.36352	412343	394129	0.955828	12621	17.3362	434848	422227	0.970976	38.094	-12.4908	-34.41	1.1044	4.99511	56.6559	3.05285	26.8932	1.49805	10.7431

## Sheet: Table_draft
Subfamily	Genus	Species	Code	ESU	Island	Location	Latitude	Longitude	samplename	Totalreads	GC	read_lngth
Achatinellinae	Achatinella	apexfulva	AAP1		Oahu	Lab pop (Poamoho)			AAP_1	8119538	31.5	276.753
Achatinellinae	Achatinella	bulimoides	ABU1		Oahu	Lab pop (Poamoho)			ABU_1	6529944	50.5	244.872
Achatinellinae	Achatinella	byroni	ABY1		Oahu	Schofield-Waikane			ABY_1	4978746	41.1
Achatinellinae	Achatinella	concavospira	ACO1		Oahu	slime swabs of temporary lab pop			ACO_1	4562818	41.7
Achatinellinae	Achatinella	concavospira	ACO2		Oahu	field samples (2)			ACO_2	4562818	41.7
Achatinellinae	Achatinella	decipiens	ADE1		Oahu	PD1-PD6			ADE_1	7054168	41	274.051
Achatinellinae	Achatinella	decipiens	ADE2		Oahu	Lab pop			ADE_2	4035250	40.9
Achatinellinae	Achatinella	decipiens	ADE3		Oahu	Kaluanui 1-28			ADE_3	4468278	41.2
Achatinellinae	Achatinella	decipiens	ADE4		Oahu	Kaluanui 29-40			ADE_4	5594312	40.8
Achatinellinae	Achatinella	decipiens	ADE5		Oahu	Kaluanui 41-45			ADE_5	7054168	41.1
Achatinellinae	Achatinella	fulgens	AFUL1		Oahu	Kului Gulch			AFUL_1	5706416	47.5	233.758
Achatinellinae	Achatinella	fulgens	AFUL2		Oahu	Pia Valley			AFUL_2	6435940	48	216.105
Achatinellinae	Achatinella	fuscobasis	AFUS1		Oahu	Lab pop			AFUS_1	5337352	45	237.38
Achatinellinae	Achatinella	lila	ALI1		Oahu	Field - Poamoho			ALI_1	8407198	41.5	300.845
Achatinellinae	Achatinella	lila	ALI2		Oahu	Field - 290 Windward			ALI_2	5246316	40	272.239
Achatinellinae	Achatinella	lila	ALI3		Oahu	Captive - Poamoho - morgue			ALI_3	7618686	48	256.561
Achatinellinae	Achatinella	livida	ALIV1		Oahu	Lab pop			ALIV_1	7095932	51.3
Achatinellinae	Achatinella	mustelina	AMU_10	ESUD	Oahu	Makaha			AMU_10	3045848	40.5	284.163
Achatinellinae	Achatinella	mustelina	AMU_11	ESUD	Oahu	Puu Hapapa			AMU_11	3518746	41	229.545
Achatinellinae	Achatinella	mustelina	AMU_12	ESUD	Oahu	Puu Kalena			AMU_12	2354794	40	234.564
Achatinellinae	Achatinella	mustelina	AMU_13	ESUD	Oahu	Puu Kumakalii			AMU_13	3182792	40	235.946
Achatinellinae	Achatinella	mustelina	AMU_14	ESUE	Oahu	Ekahanui			AMU_14	2965040	41	230.076
Achatinellinae	Achatinella	mustelina	AMU_15	ESUF	Oahu	Palikea			AMU_15	2374954	40	232.936
Achatinellinae	Achatinella	mustelina	AMU_16	ESUE	Oahu	H1-H4 (Huliwai)			AMU_16	5774984	40	241.165
Achatinellinae	Achatinella	mustelina	AMU_17	ESUE	Oahu	NH1-NH4			AMU_17	3809330	40	276.658
Achatinellinae	Achatinella	mustelina	AMU_18	ESUD	Oahu	K1-K6			AMU_18	5362324	41.5	269.657
Achatinellinae	Achatinella	mustelina	AMU_19	ESUD	Oahu	S1-S6			AMU_19	5633994	41.5	276.283
Achatinellinae	Achatinella	mustelina	AMU_1	ESUA	Oahu	Kahanahaiki			AMU_1	6246584	44	278.006
Achatinellinae	Achatinella	mustelina	AMU_20	ESUB	Oahu	Kaawa 1-13			AMU_20	5308080	41	273.694
Achatinellinae	Achatinella	mustelina	AMU_21	ESUD	Oahu	MAK-G 1-15			AMU_21	4931932	41	268.732
Achatinellinae	Achatinella	mustelina	AMU_22	ESUD	Oahu	MAK-F 1-7			AMU_22	4462150	41	270.571
Achatinellinae	Achatinella	mustelina	AMU_2	ESUA	Oahu	Pahole			AMU_2	6423834	41	276.644
Achatinellinae	Achatinella	mustelina	AMU_3	ESUB	Oahu	Koiahi			AMU_3	5571576	40.5	280.512
Achatinellinae	Achatinella	mustelina	AMU_4	ESUB	Oahu	Ohikilolo			AMU_4	7710220	41	228.319
Achatinellinae	Achatinella	mustelina	AMU_5	ESUB	Oahu	Culvert 39			AMU_5	6380944	41	249.935
Achatinellinae	Achatinella	mustelina	AMU_6	ESUB	Oahu	Culvert 56/57			AMU_6	5202138	40.5	281.253
Achatinellinae	Achatinella	mustelina	AMU_7	ESUC	Oahu	Skeet Pass			AMU_7	5901776	41	268.908
Achatinellinae	Achatinella	mustelina	AMU_8	ESUC	Oahu	Haleauau			AMU_8	6503420	41	246.91
Achatinellinae	Achatinella	mustelina	AMU_9	ESUD	Oahu	SBW-R			AMU_9	3346192	40	238.062
Achatinellinae	Achatinella	sowerbyana	ASO1		Oahu	Poamoho Summit			ASO_1	5737666	40	279.604
Achatinellinae	Achatinella	sowerbyana	ASO2		Oahu	290 Windward			ASO_2	4851700	40	274.9
Achatinellinae	Achatinella	sowerbyana	ASO3		Oahu	290 Summit/Peahinaia			ASO_3	4657426	40	273.434
Achatinellinae	Achatinella	sowerbyana	ASO4		Oahu	Poamoho Trail			ASO_4	4635484	40	276.36
Achatinellinae	Achatinella	sowerbyana	ASO5		Oahu	Hypalon			ASO_5	4429486	40.5	260.663
Achatinellinae	Achatinella	sowerbyana	ASO6		Oahu	Opaeula			ASO_6	5235580	41	264.367
Achatinellinae	Achatinella	sowerbyana	ASO7		Oahu	field sample (1)			ASO_7
Achatinellinae	Achatinella	sp. Oahu	AUN1		Oahu	Poamoho unknown snail			AUN_1	5226018	41	269.792
Auricullelinae	Auriculella	sp.	AUR1		Oahu	Poamoho			AU_R1	4782886	41	282.899
Achatinellinae	Newcombia	cumingi	NCU1		Maui	Lab pop			NCU_1	6519964	39	255.936
Achatinellinae	Perdicella	sp. Maui	PER1		Maui	Hanaula (above windfarm)			PE_R1	4951340	41	279.534
Achatinellinae	Perdicella	helena	PHE1		Molokai	ph3-PH38			PHE_1	3675944	40	285.052
Achatinellinae	Perdicella	helena	PHE2		Molokai	PAP01-PAP31			PHE_2	4074556	40	281.168
Achatinellinae	Partulina	mighelsiana	PMI1		Molokai	PAM01-PAM60			PMI_1	4524560	40	270.927
Achatinellinae	Partulina	perdix	PPE1		Maui	Lab pop			PPE_1	6311830	41	265.791
Achatinellinae	Partulina	perdix	PPE2		Maui	13MAU - Hanaula			PPE_2	4202976	40	284.145
Achatinellinae	Partulina	physa	PPH1		Hawaii	Lab pop			PPH_1	6649202	53	260.037
Achatinellinae	Partulina	proxima	PPR1		Molokai	pp5-pp10			PPR_1	4643158	40	281.051
Achatinellinae	Partulina	proxima	PPR2		Molokai	pp1-pp4			PPR_2	3806748	40	274.927
Achatinellinae	Partulina	proxima	PPR3		Molokai	pp11-pp16			PPR_3	5645806	48	249.016
Achatinellinae	Partulina	redfieldii	PRE1		Molokai	mixed			PRE_1	2749370	40	242.025
Achatinellinae	Partulina	redfieldii	PRE2		Molokai	pr1-pr3,PR33-PR39			PRE_2	4040244	40.5	277.919
Achatinellinae	Partulina	redfieldii	PRE3		Molokai	pr4-pr32,PR40-PR88,F2-F16			PRE_3	4059102	40	277.491
Achatinellinae	Partulina	redfieldii	PRE4		Molokai	PR89-PR138			PRE_4	5151524	40.5	273.821
Achatinellinae	Partulina	semicarinata	PSE1		Lanai	lab			PSE_1	4411370	48.5	248.519
Achatinellinae	Partulina	tesselata	PTE1		Molokai	PAT01-PAT09			PTER_1	5858984	41	271.979
Achatinellinae	Partulina	terebra	PTER1		Maui	above windmills			PTES_11	3834086	40	284.33
Achatinellinae	Partulina	variabilis	PVA1		Lanai	Lanai (combined)			PVA_11	5189316	40.5	252.005
Tornatellidinae	Tornatellides	irregularis	TIR1		Maui				TIR_1	5027094	42	268.979
